# Supplementary material
Source: PubMed Central journal article supplement (PMC4991361)
Supplement: NIHMS765138-supplement-supp_info.pdf [file NIHMS765138-supplement-supp_info.pdf]

## Table of Contents

|                             |                                                                                                        |
|-----------------------------|--------------------------------------------------------------------------------------------------------|
| Supplementary Figure 1..... | SDS-PAGE characterization of RhuA mutants                                                              |
| Supplementary Figure 2..... | Positive ESI-MS characterization of RhuA mutants                                                       |
| Supplementary Figure 3..... | Thermal and organic-solvent stability of <sup>C98</sup> RhuA crystals                                  |
| Supplementary Table 1.....  | List of primers used in constructing site-directed mutants of RhuA using <sup>C98</sup> RhuA as a base |
| Supplementary Table 2.....  | Amino acid sequences of RhuA variants                                                                  |
| Supplementary Table 3.....  | Molecular masses of RhuA mutants                                                                       |
| Supplementary Table 4.....  | Symmetry analysis for the 2D lattices of RhuA variants                                                 |

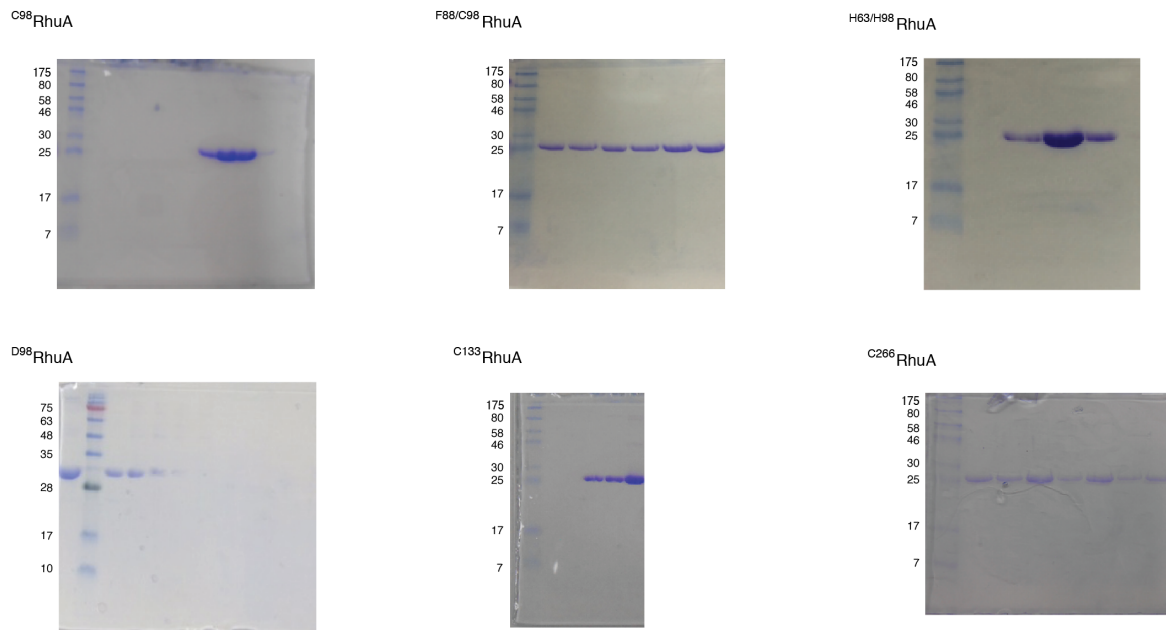

**Supplementary Figure 1 | SDS-PAGE characterization of RhuA mutants.**

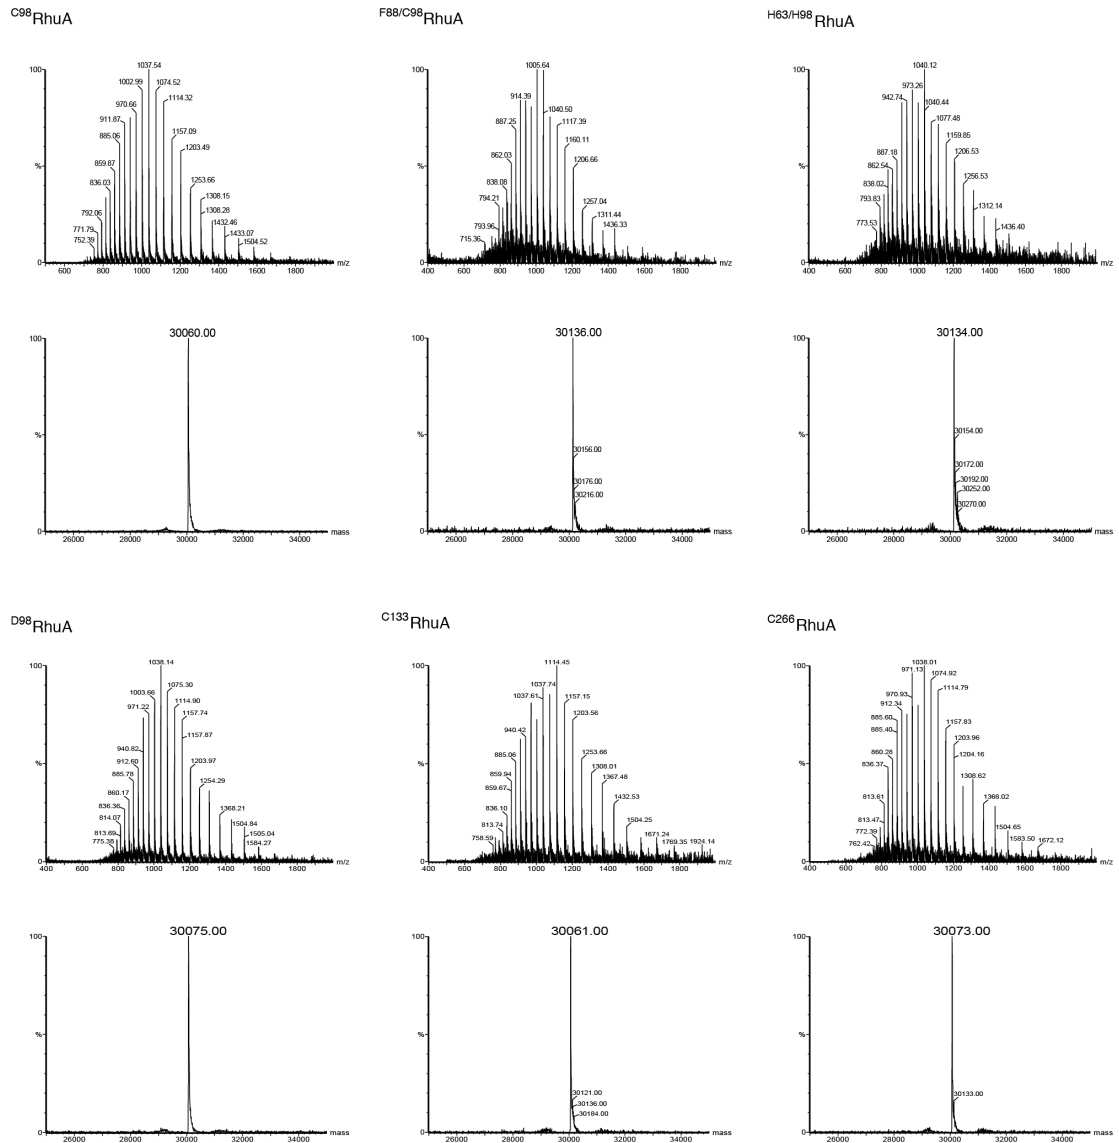

**Supplementary Figure 2 | Positive ESI-MS characterization of RhuA mutants.** Top spectra display the raw data showing the cluster ions. The bottom panels are the deconvoluted spectra.

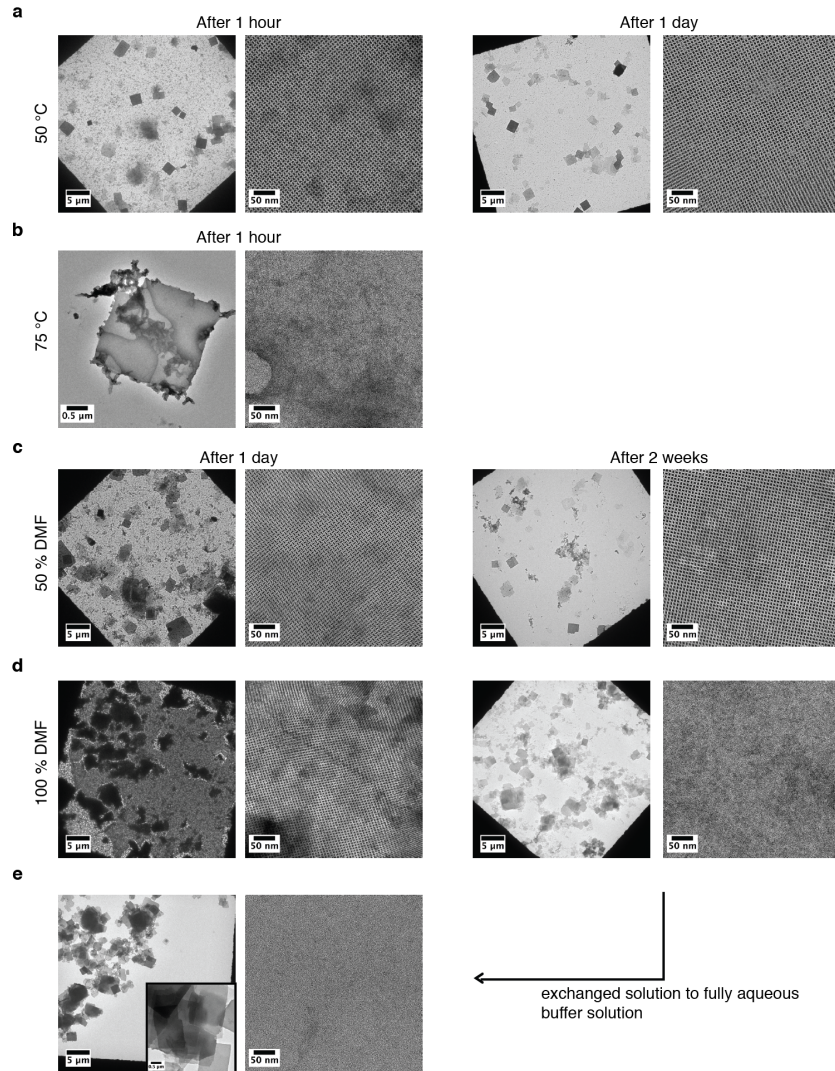

**Supplementary Figure 3 | Thermal and organic-solvent stability of  $C^{98}$ RhuA crystals.** a-d,  $C^{98}$ RhuA crystals were incubated at 50 °C, 75 °C, 50% DMF/H<sub>2</sub>O and 100% DMF for indicated periods and characterized by TEM. The lattices were found to be stable at 50 °C for prolonged periods and retained their crystallinity, whereas at 75 °C, both the lattice morphology and the crystallinity were lost due likely to the denaturation of  $C^{98}$ RhuA building blocks. Likewise, in 50 50% DMF/H<sub>2</sub>O solutions, the lattices were indefinitely stable and crystalline, but appear to gradually lose both properties in 100% DMF. Interestingly, the lattice morphologies were retained, suggesting that the  $C^{98}$ RhuA building blocks likely denatured but still remained tightly associated with one another within the framework. e, The crystallinity of the samples in 100% DMF could not be recovered upon exchange into aqueous buffer, indicating that protein denaturation is irreversible.

**Supplementary Table 1 | List of primers used in constructing site-directed mutants of RhuA using <sup>C98</sup>RhuA as a base.**

| Variant                 | Mutation     | Primer Sequence                                                                                                                                                                                            |
|-------------------------|--------------|------------------------------------------------------------------------------------------------------------------------------------------------------------------------------------------------------------|
| <sup>F88/C98</sup> RhuA | A88F         | 5'-CGCAATGTCCAGTTGGACCCAGCGTTTAACTGGGCATTGTTAAGGTGG-3'<br>5'-CCACCTTAACAATGCCAGGTTAAACGCTGGGTCCAACCTGGACATTGCG-3'                                                                                          |
| <sup>H63/H98</sup> RhuA | P63H<br>C98H | 5'- CGCTGAGCCAGCCGATGCATCTGTTGGCGAATACCC -3'<br>5'- GGGTATTCGCCAACAGATGCATCGGCTGGCTCAGCG -3'<br>5'- GGGCATTGTTAAGGTGGATAGCCATGGTGCAGGTTACCACATCC-3'<br>5'- GGATGTGGTAACCTGCACCATGGCTATCCACCTTAACAATGCC -3' |
| <sup>D98</sup> RhuA     | C98D         | 5'- GCATTGTTAAGGTGGATAGCGACGGTGCAGGTTACCACATCC -3'<br>5'- GGATGTGGTAACCTGCACCGTCGCTATCCACCTTAACAATGC -3'                                                                                                   |
| <sup>C133</sup> RhuA    | N133C        | 5'- GCGAGCGTATCAAGGCGACCTGCGGCAAAGACCGCG-3'<br>5'- CGCGGTCTTTGCCGAGGTCGCCTTGATACGCTCGC-3'                                                                                                                  |
| <sup>C266</sup> RhuA    | T266C        | 5'- GGTAAGCGTTTTTGGTGTCTGTCCGCTGGCGTCCGCGCTGG-3'<br>5'- CCAGCGCGGACGCCAGCGGACAGACACCAAAACGCTTACC-3'                                                                                                        |

**Supplementary Table 2 | Amino acid sequences of RhuA variants. Point mutation positions are underlined.**

| Variant                 | Amino Acid Sequence                                                                                                                                                                                                                                                                                                                                                                                                                                                                                                                                          |
|-------------------------|--------------------------------------------------------------------------------------------------------------------------------------------------------------------------------------------------------------------------------------------------------------------------------------------------------------------------------------------------------------------------------------------------------------------------------------------------------------------------------------------------------------------------------------------------------------|
| <sup>C98</sup> RhuA     | MQNITQSWFVQGMIKATTD <sup>AW</sup> LK <sup>GW</sup> DERN <sup>GG</sup> NLTLRLDDADIAPYH <sup>DN</sup> FH <sup>QQ</sup> PRYIPLS<br>QPMPL <sup>L</sup> ANTPFIVT <sup>GS</sup> GK <sup>FF</sup> RV <sup>QL</sup> DPAA <sup>NL</sup> GIVK <sup>VDS</sup> <u>C</u> GAGYHILWGLTNEAVPTSELPA<br>HFLSHSERIKATNGKDRVIMHCHATNLI <sup>ALTY</sup> VLENDTAVFTRQLWEGSTECLVVFPDGVG<br>ILP <sup>WM</sup> VPGTDAIGQATAQEMQK <sup>HSL</sup> VLPFH <sup>GV</sup> FV <sup>GS</sup> GPTLDETFGLIDTAEKSAQVLVKV<br>YSMGGMKQTISREELIALGK <sup>RFG</sup> VTP <sup>LA</sup> SALAL          |
| <sup>H63/H98</sup> RhuA | MQNITQSWFVQGMIKATTD <sup>AW</sup> LK <sup>GW</sup> DERN <sup>GG</sup> NLTLRLDDADIAPYH <sup>DN</sup> FH <sup>QQ</sup> PRYIPLS<br>QPM <u>H</u> LLANTPFIVT <sup>GS</sup> GK <sup>FF</sup> RV <sup>QL</sup> DPAA <sup>NL</sup> GIVK <sup>VDS</sup> <u>H</u> GAGYHILWGLTNEAVPTSELPA<br>HFLSHSERIKATNGKDRVIMHCHATNLI <sup>ALTY</sup> VLENDTAVFTRQLWEGSTECLVVFPDGVG<br>ILP <sup>WM</sup> VPGTDAIGQATAQEMQK <sup>HSL</sup> VLPFH <sup>GV</sup> FV <sup>GS</sup> GPTLDETFGLIDTAEKSAQVLVKV<br>YSMGGMKQTISREELIALGK <sup>RFG</sup> VTP <sup>LA</sup> SALAL              |
| <sup>F88/C98</sup> RhuA | MQNITQSWFVQGMIKATTD <sup>AW</sup> LK <sup>GW</sup> DERN <sup>GG</sup> NLTLRLDDADIAPYH <sup>DN</sup> FH <sup>QQ</sup> PRYIPLS<br>QPMPL <sup>L</sup> ANTPFIVT <sup>GS</sup> GK <sup>FF</sup> RV <sup>QL</sup> DPAA <sup>NL</sup> <u>F</u> GIVK <sup>VDS</sup> <u>C</u> GAGYHILWGLTNEAVPTSELPA<br>HFLSHSERIKATNGKDRVIMHCHATNLI <sup>ALTY</sup> VLENDTAVFTRQLWEGSTECLVVFPDGVG<br>ILP <sup>WM</sup> VPGTDAIGQATAQEMQK <sup>HSL</sup> VLPFH <sup>GV</sup> FV <sup>GS</sup> GPTLDETFGLIDTAEKSAQVLVKV<br>YSMGGMKQTISREELIALGK <sup>RFG</sup> VTP <sup>LA</sup> SALAL |
| <sup>D98</sup> RhuA     | MQNITQSWFVQGMIKATTD <sup>AW</sup> LK <sup>GW</sup> DERN <sup>GG</sup> NLTLRLDDADIAPYH <sup>DN</sup> FH <sup>QQ</sup> PRYIPLS<br>QPMPL <sup>L</sup> ANTPFIVT <sup>GS</sup> GK <sup>FF</sup> RV <sup>QL</sup> DPAA <sup>NL</sup> GIVK <sup>VDS</sup> <u>D</u> GAGYHILWGLTNEAVPTSELPA<br>HFLSHSERIKATNGKDRVIMHCHATNLI <sup>ALTY</sup> VLENDTAVFTRQLWEGSTECLVVFPDGVG<br>ILP <sup>WM</sup> VPGTDAIGQATAQEMQK <sup>HSL</sup> VLPFH <sup>GV</sup> FV <sup>GS</sup> GPTLDETFGLIDTAEKSAQVLVKV<br>YSMGGMKQTISREELIALGK <sup>RFG</sup> VTP <sup>LA</sup> SALAL          |
| <sup>C133</sup> RhuA    | MQNITQSWFVQGMIKATTD <sup>AW</sup> LK <sup>GW</sup> DERN <sup>GG</sup> NLTLRLDDADIAPYH <sup>DN</sup> FH <sup>QQ</sup> PRYIPLS<br>QPMPL <sup>L</sup> ANTPFIVT <sup>GS</sup> GK <sup>FF</sup> RV <sup>QL</sup> DPAA <sup>NL</sup> GIVK <sup>VDS</sup> DGAGYHILWGLTNEAVPTSELPA<br>HFLSHSERIKAT <u>C</u> GKDRVIMHCHATNLI <sup>ALTY</sup> VLENDTAVFTRQLWEGSTECLVVFPDGVG<br>ILP <sup>WM</sup> VPGTDAIGQATAQEMQK <sup>HSL</sup> VLPFH <sup>GV</sup> FV <sup>GS</sup> GPTLDETFGLIDTAEKSAQVLVKV<br>YSMGGMKQTISREELIALGK <sup>RFG</sup> VTP <sup>LA</sup> SALAL         |
| <sup>C266</sup> RhuA    | MQNITQSWFVQGMIKATTD <sup>AW</sup> LK <sup>GW</sup> DERN <sup>GG</sup> NLTLRLDDADIAPYH <sup>DN</sup> FH <sup>QQ</sup> PRYIPLS<br>QPMPL <sup>L</sup> ANTPFIVT <sup>GS</sup> GK <sup>FF</sup> RV <sup>QL</sup> DPAA <sup>NL</sup> GIVK <sup>VDS</sup> DGAGYHILWGLTNEAVPTSELPA<br>HFLSHSERIKATNGKDRVIMHCHATNLI <sup>ALTY</sup> VLENDTAVFTRQLWEGSTECLVVFPDGVG<br>ILP <sup>WM</sup> VPGTDAIGQATAQEMQK <sup>HSL</sup> VLPFH <sup>GV</sup> FV <sup>GS</sup> GPTLDETFGLIDTAEKSAQVLVKV<br>YSMGGMKQTISREELIALGK <sup>RFG</sup> V <u>C</u> PLASALAL                      |

**Supplementary Table 3 | Molecular masses of RhuA mutants.** For the actual mass spectra, refer to Supplementary Figure 2.

| <b>Variant</b>          | <b>Calculated Mass (Da)</b> | <b>Observed Mass (Da)</b> |
|-------------------------|-----------------------------|---------------------------|
| <sup>C98</sup> RhuA     | 30059.5                     | 30060.0                   |
| <sup>F88/C98</sup> RhuA | 30135.6                     | 30136.0                   |
| <sup>H63/H98</sup> RhuA | 30133.5                     | 30134.0                   |
| <sup>D98</sup> RhuA     | 30071.4                     | 30075.0                   |
| <sup>C133</sup> RhuA    | 30060.4                     | 30061.0                   |
| <sup>C266</sup> RhuA    | 30073.4                     | 30073.0                   |

**Supplementary Table 4 | Symmetry analysis for the 2D lattices of RhuA variants.** Internal phase residuals for all possible non-hexagonal plane groups. Residuals were determined from the power spectra shown in Extended Data Fig. 10a using the program ALLSPACE, as described in Methods. Reflections up to 11 Å and with IQ less than 6 were included in the calculations.

**a,** <sup>C98</sup>RhuA

| 2D plane group                  | Phase Residual <sup>a</sup> (°) | Number of comparisons | Target Residual <sup>b</sup> (°) |
|---------------------------------|---------------------------------|-----------------------|----------------------------------|
| p1                              | 22.4 <sup>c</sup>               | 126                   |                                  |
| p2                              | 29.6*                           | 63                    | 32.5                             |
| p12_b                           | 74.6                            | 45                    | 23.1                             |
| p12_a                           | 73.8                            | 45                    | 23.1                             |
| p12 <sub>1</sub> _b             | 18.1*                           | 45                    | 23.1                             |
| p12 <sub>1</sub> _a             | 12.8*                           | 45                    | 23.1                             |
| c12_b                           | 74.6                            | 45                    | 23.1                             |
| c12_a                           | 73.8                            | 45                    | 23.1                             |
| p222                            | 56.1                            | 153                   | 26.6                             |
| p222 <sub>1</sub> _b            | 54.2                            | 153                   | 26.6                             |
| p222 <sub>1</sub> _a            | 56.6                            | 153                   | 26.6                             |
| p22 <sub>1</sub> 2 <sub>1</sub> | 21.6*                           | 153                   | 26.6                             |
| c222                            | 56.1                            | 153                   | 26.6                             |
| p4                              | 26.7*                           | 155                   | 26.5                             |
| p422                            | 52.6                            | 333                   | 24.3                             |
| p42 <sub>1</sub> 2              | 24.4*                           | 333                   | 24.3                             |

<sup>a</sup> Phase residual versus other spots (90° = random).

<sup>b</sup> Expected residual based on the quality of the reflections involved in the calculation.

<sup>c</sup> Theoretical, based on the quality of the reflections observed

\* acceptable (better than target or within 1°)

† to be considered (within 5° from target)

§ possibility (within 10° from target)



**b,** <sup>H63/H98</sup>RhuA

| 2D plane group                  | Phase Residual <sup>a</sup> (°) | Number of comparisons | Target Residual <sup>b</sup> (°) |
|---------------------------------|---------------------------------|-----------------------|----------------------------------|
| p1                              | 21.8 <sup>c</sup>               | 96                    |                                  |
| p2                              | 29.4 <sup>*</sup>               | 48                    | 31.6                             |
| p12_b                           | 44.7                            | 28                    | 23.2                             |
| p12_a                           | 46.0                            | 31                    | 24.0                             |
| p12 <sub>1</sub> _b             | 73.0                            | 28                    | 23.2                             |
| p12 <sub>1</sub> _a             | 79.5                            | 31                    | 24.0                             |
| c12_b                           | 44.7                            | 28                    | 23.2                             |
| c12_a                           | 46.0                            | 31                    | 24.0                             |
| p222                            | 38.5                            | 107                   | 26.2                             |
| p222 <sub>1</sub> _b            | 64.7                            | 107                   | 26.2                             |
| p222 <sub>1</sub> _a            | 70.9                            | 107                   | 26.2                             |
| p22 <sub>1</sub> 2 <sub>1</sub> | 62.6                            | 107                   | 26.2                             |
| c222                            | 38.5                            | 107                   | 26.2                             |
| p4                              | 23.1 <sup>*</sup>               | 112                   | 26.0                             |
| p422                            | 31.9 <sup>§</sup>               | 231                   | 23.8                             |
| p42 <sub>1</sub> 2              | 62.1                            | 231                   | 23.8                             |

<sup>a</sup> Phase residual versus other spots (90° = random).

<sup>b</sup> Expected residual based on the quality of the reflections involved in the calculation.

<sup>c</sup> Theoretical, based on the quality of the reflections observed

\* acceptable (better than target or within 1°)

† to be considered (within 5° from target)

§ possibility (within 10° from target)

c, <sup>F88/C98</sup>RhuA

| 2D plane group                  | Phase Residual <sup>a</sup> (°) | Number of comparisons | Target Residual <sup>b</sup> (°) |
|---------------------------------|---------------------------------|-----------------------|----------------------------------|
| p1                              | 26.8 <sup>c</sup>               | 160                   |                                  |
| p2                              | 26.4 <sup>*</sup>               | 80                    | 39.3                             |
| p12_b                           | 71.2                            | 54                    | 27.7                             |
| p12_a                           | 70.4                            | 56                    | 28.1                             |
| p12 <sub>1</sub> _b             | 14.1 <sup>*</sup>               | 54                    | 27.7                             |
| p12 <sub>1</sub> _a             | 13.1 <sup>*</sup>               | 56                    | 28.1                             |
| c12_b                           | 71.2                            | 54                    | 27.7                             |
| c12_a                           | 70.4                            | 56                    | 28.1                             |
| p222                            | 52.1                            | 190                   | 32.1                             |
| p222 <sub>1</sub> _b            | 56.9                            | 190                   | 32.1                             |
| p222 <sub>1</sub> _a            | 58.3                            | 190                   | 32.1                             |
| p22 <sub>1</sub> 2 <sub>1</sub> | 19.3 <sup>*</sup>               | 190                   | 32.1                             |
| c222                            | 52.1                            | 190                   | 32.1                             |
| p4                              | 17.3 <sup>*</sup>               | 204                   | 31.7                             |
| p422                            | 45.7                            | 431                   | 29.1                             |
| p42 <sub>1</sub> 2              | 16.0 <sup>*</sup>               | 431                   | 29.1                             |

<sup>a</sup> Phase residual versus other spots (90° = random).

<sup>b</sup> Expected residual based on the quality of the reflections involved in the calculation.

<sup>c</sup> Theoretical, based on the quality of the reflections observed

\* acceptable (better than target or within 1°)

† to be considered (within 5° from target)

§ possibility (within 10° from target)
